# Supplementary material for: Targeted suppression of microRNA-33 in lesional macrophages using pH low-insertion peptides (pHLIP) improves atherosclerotic plaque regression
Source: Research Square preprint supplement (doi:10.21203/rs.3.rs-92252/v1), 2020-10-29

## SUPPLEMENTARY INFORMATION

### **Targeted suppression of microRNA-33 in lesional macrophages using pH low-insertion peptides (pHLIP) improves atherosclerotic plaque regression**

Xinbo Zhang, Noemi Rotllan, Alberto Canfrán-Duque, Jakub Toczek, Anna Moshnikova, Shipra Malik, Nathan L. Price, Elisa Araldi, Wen Zhong, Mehran M. Sadeghi, Oleg A. Andreev, Raman Bahal, Yana Reshetnyak, Yajaira Suárez, Carlos Fernández-Hernando.

#### **SUPPLEMENTAL FIGURE LEGENDS**

**Supp Figure 1. pH low inducible peptides (pHLIP) promotes delivery of miR-33 inhibitors to the atherosclerotic plaques.** **a-b**, Representative images (**a**) and quantification (**b**) of tissues from low density lipoprotein receptor knockout (*Ldlr*<sup>-/-</sup>) mice injected with fluorescently labeled targeted (A750-Var3) or non-inserting control (A750-5K-Var3) constructs. *Ldlr*<sup>-/-</sup> mice were fed a western diet (WD) for 3 months to induce atherosclerosis and tissues were harvested 4-24 hours post injection of constructs. **c**, Representative images demonstrating uptake of A546-Var3 into liver and kidney with A546-5K-Var3 as control.

**Supp Figure 2. Targeted silencing of miR-33 does not result in differences in circulating lipids, lipoprotein profiles and body weight.** **a**, Measurement of plasma total cholesterol, high density lipoprotein (HDL) cholesterol and triglycerides from Low density lipoprotein receptor knockout (*Ldlr*<sup>-/-</sup>) mice injected anti-miR-33 peptide nucleic acid delivery vector (anti-miR33<sup>pHLIP</sup>) or scrambled control (Src<sup>pHLIP</sup>) (*n*= 6-13 each group). **b**, Lipoprotein profiles by FPLC from *Ldlr*<sup>-/-</sup> mice injected anti-miR33<sup>pHLIP</sup> or Src<sup>pHLIP</sup>. **c**, Body weight of *Ldlr*<sup>-/-</sup> mice injected anti-miR33<sup>pHLIP</sup> or Src<sup>pHLIP</sup> (*n*= 14-18 per group). Quantification represents the mean ± s.e.m. Data were analyzed by one-way ANOVA with Bonferroni correction for multiple comparisons.

**Supp Figure 3. Selective targeting of miR-33 by pHLP peptides shows no difference in circulating leukocytes composition and hepatic function.** **a**, Quantification of peripheral blood counts by hemocytometer from *Ldlr*<sup>-/-</sup> mice injected anti-miR-33 peptide nucleic acid delivery vector (anti-miR33<sup>pHLP</sup>) or scrambled control (Src<sup>pHLP</sup>) (*n*= 7-9 each group). **b**, Quantification of serum hepatotoxicity markers, aspartate aminotransferase (AST) and alanine aminotransferase (ALT), from *Ldlr*<sup>-/-</sup> mice injected anti-miR33<sup>pHLP</sup> or Src<sup>pHLP</sup> (*n*= 7-9 each group). Quantification represents the mean  $\pm$  s.e.m. Data were analyzed by an unpaired two-sided Student's t-test.

**Supp Figure 4. Targeted silencing of miR-33 does not influence macrophage and smooth muscle cell content in atherosclerotic lesions.** Low density lipoprotein receptor knockout (*Ldlr*<sup>-/-</sup>) mice were placed on a western diet (WD) for 3 months, and then switched to a chow diet and received anti-miR-33 peptide nucleic acid delivery vector (anti-miR33<sup>pHLP</sup>) or scrambled control (Src<sup>pHLP</sup>) at a dose of 1 mg/kg body weight every week for a total of 5 injections. Representative immunofluorescence staining of macrophage (CD68 positive) and smooth muscle cell ( $\alpha$ -smooth muscle actin) in cross sections of the aortic root from *Ldlr*<sup>-/-</sup> mice injected with anti-miR33<sup>pHLP</sup> or Src<sup>pHLP</sup> vectors. Quantification of macrophage and smooth muscle cell content are shown in the right panel. Data were analyzed by one-way ANOVA with Bonferroni correction for multiple comparisons (*n*= 6-13 per group). Scale bar: 100  $\mu$ m.

**Supp Figure 5. pHLP-mediated miR-33 silencing does not influence hepatic ABCA1 and ABCG1 expression.** Representative Western blot analysis of ABCA1 and ABCG1 in the liver from mice injected with anti-miR-33<sup>pHLP</sup> or Src<sup>pHLP</sup>. Quantification are shown in the bottom panels. Data were analyzed by an unpaired two-sided Student's t-test (*n*= 5 per group). Quantification represents the mean  $\pm$  s.e.m.

**Supp Figure 6. Single cell RNAseq analysis of whole aortic cells treated with anti-miR-33 peptide nucleic acid delivery vector (anti-miR33<sup>pHLIP</sup>) or scrambled control (Src<sup>pHLIP</sup>).** **a**, Heatmap of the 20 most upregulated genes in each cluster defined in **Fig. 4a** and selected enriched genes used for biological identification of each cluster. **b**, Proportions of cells extracted from the atherosclerotic aortas of anti-miR33<sup>pHLIP</sup> and Src<sup>pHLIP</sup>-treated mice.

**Supp Figure 7. Gene expression features from indicated monocytes/macrophages clusters.** **a**, Uniform manifold approximation and projection (UMAP) plots of *Cd14*, *Cd68*, *Adgre1*, and *Csf1r* in sorted cells from atherosclerotic plaques of mice treated with anti-miR-33 peptide nucleic acid delivery vector (anti-miR33<sup>pHLIP</sup>) or scrambled control (Src<sup>pHLIP</sup>) . **b**, UMAP plots of most highly upregulated genes for clusters of Trem2<sup>high</sup> Mac, F10<sup>+</sup> Mono, Inflammatory Mac and Stem-like Mac. **c**, UMAP plots of most highly upregulated genes for ECM<sup>high</sup> Mac cluster.

Supplementary Fig 1

a

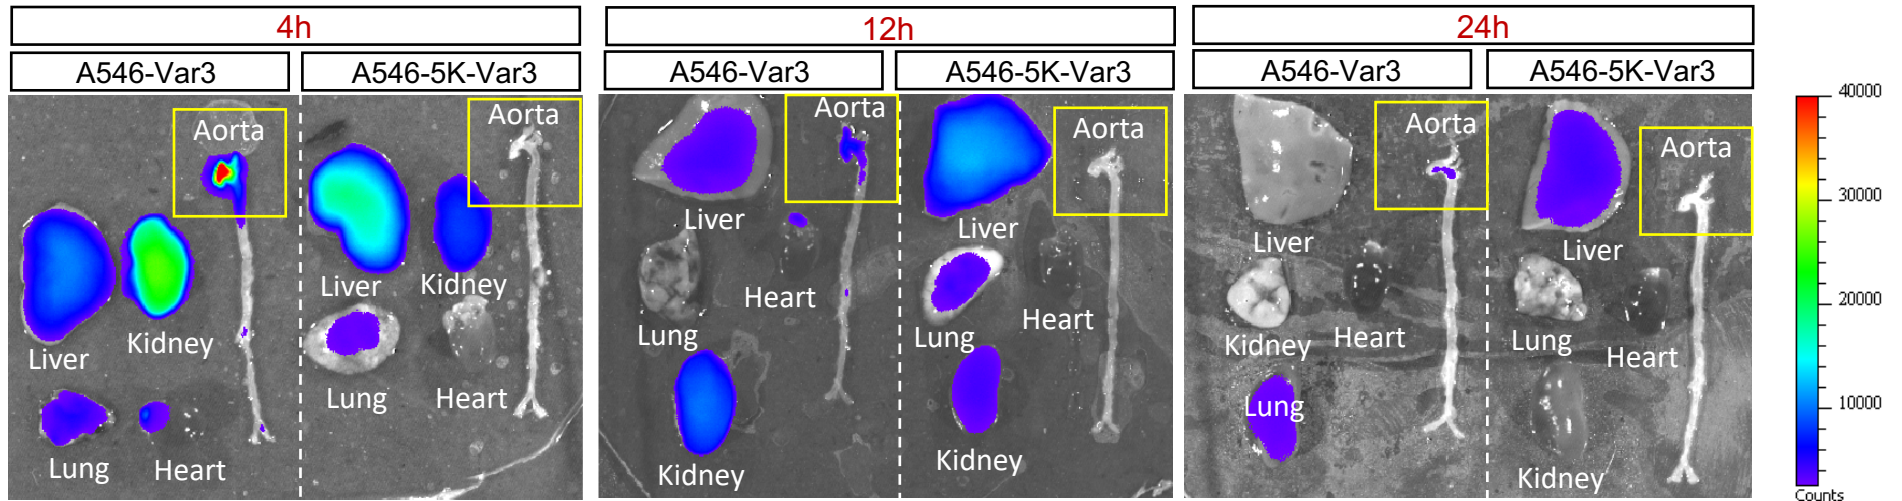

b

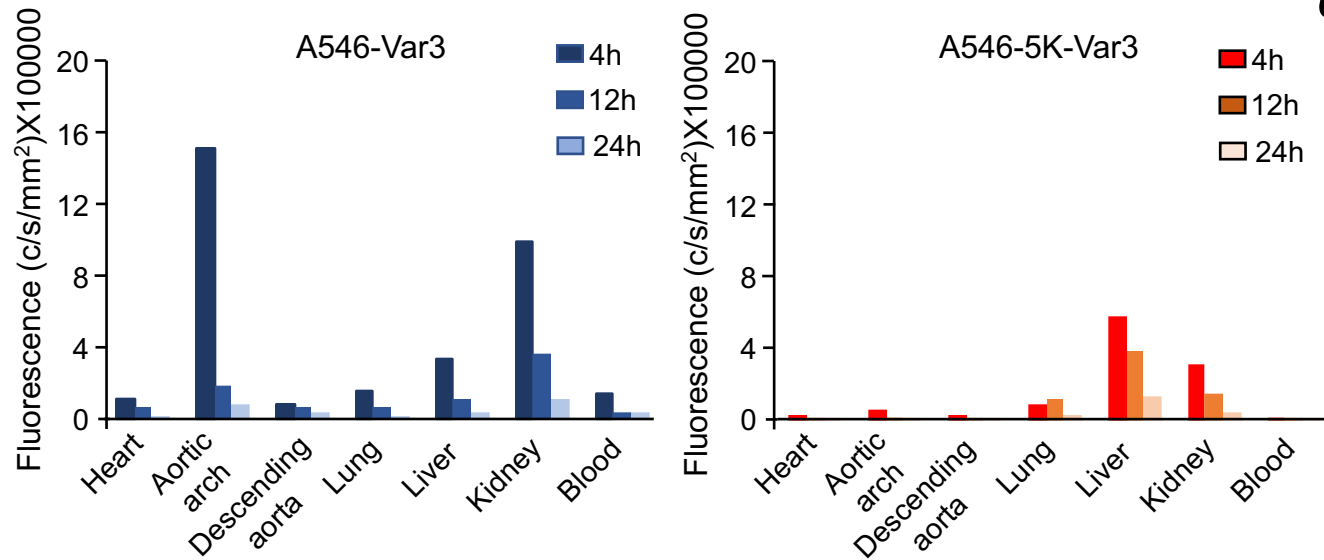

c

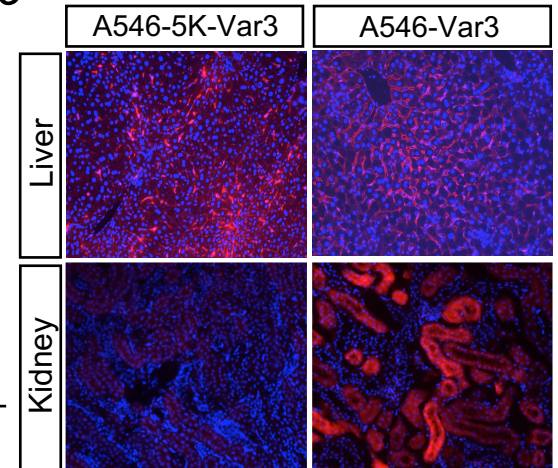

Supplementary Figure 2

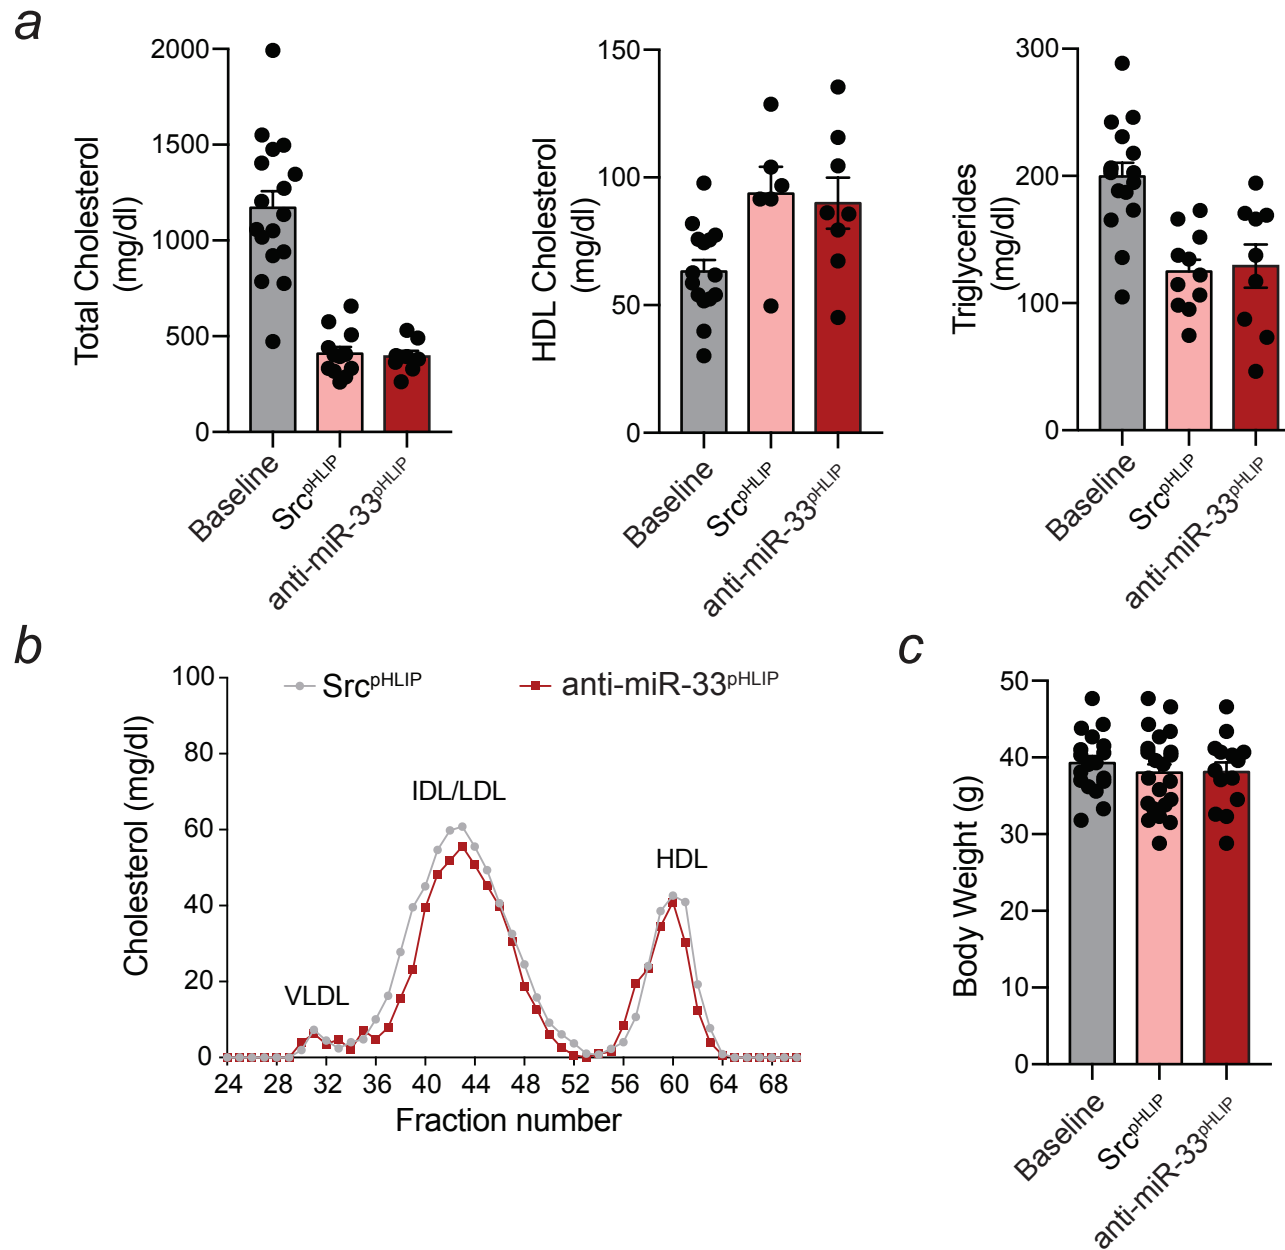

# Supplemental Figure 3

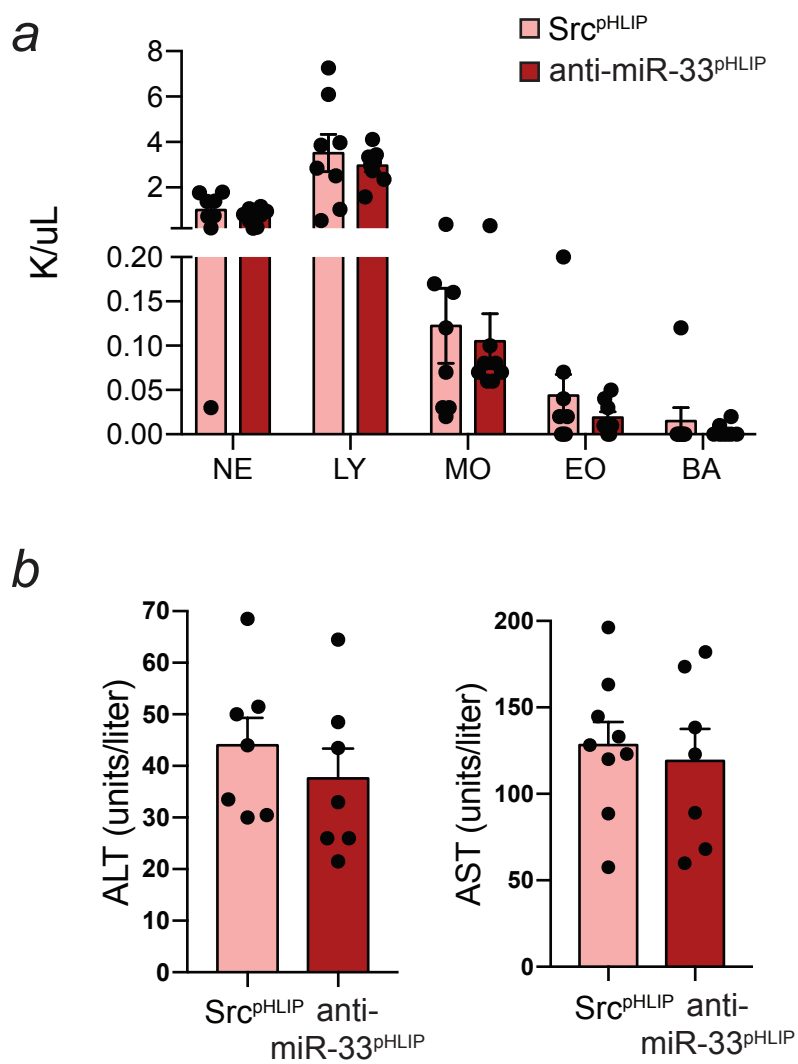

# Supplemental Figure 4

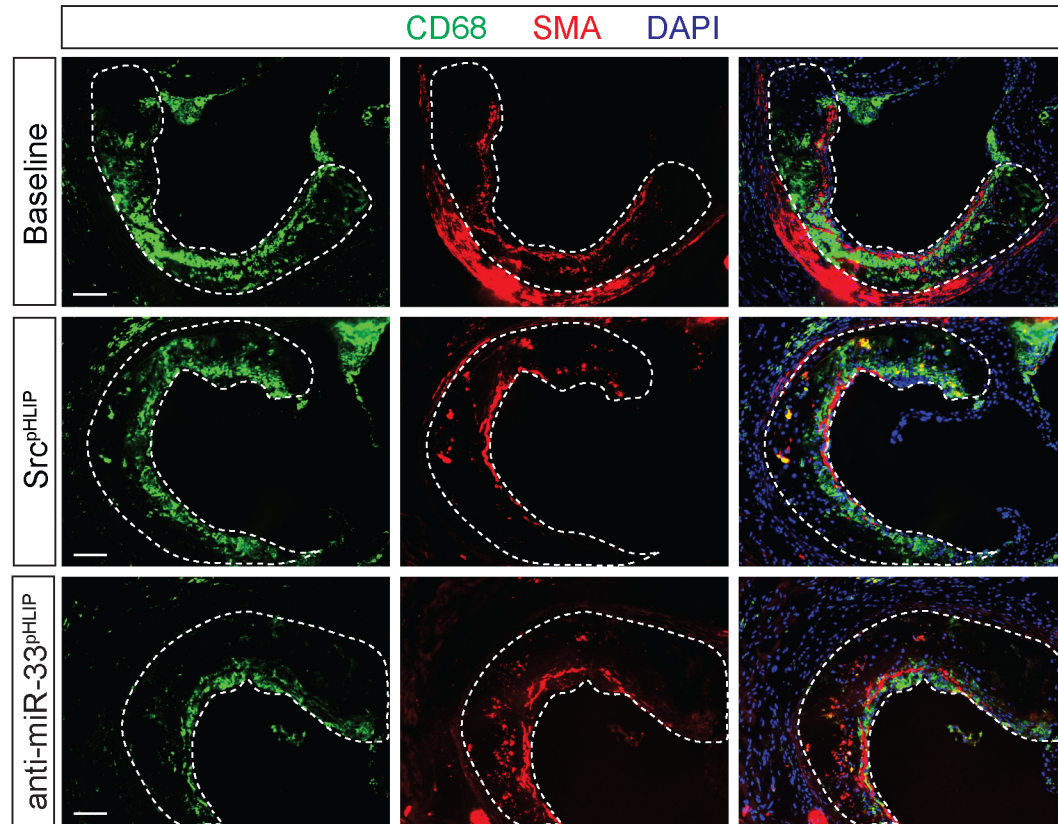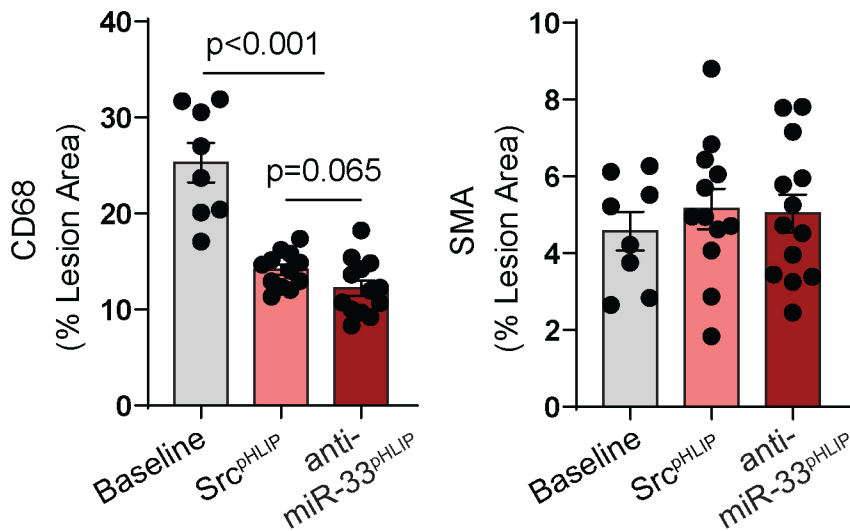

## Supplemental Figure 5

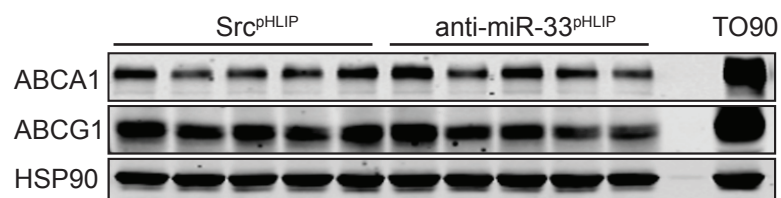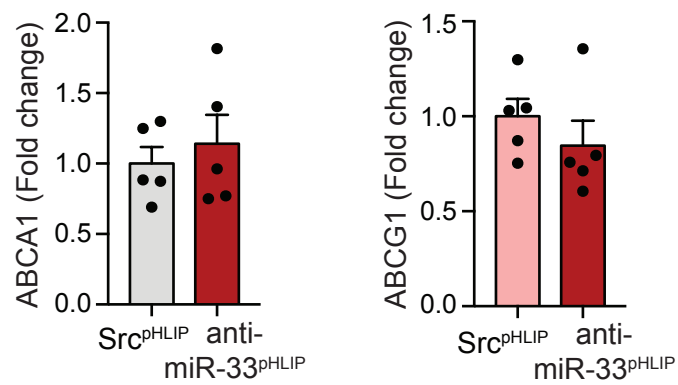



# Supplemental Figure 6

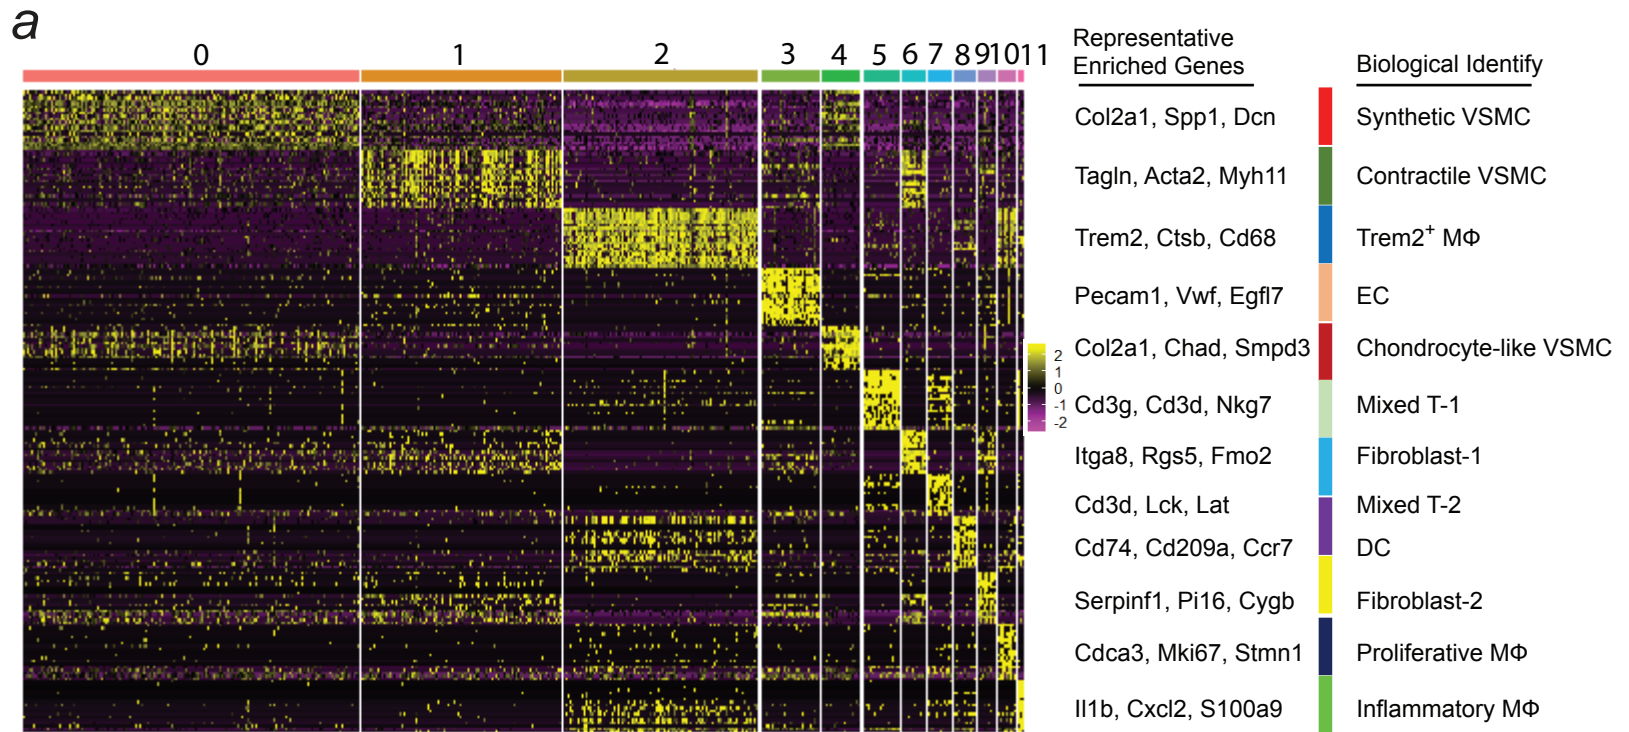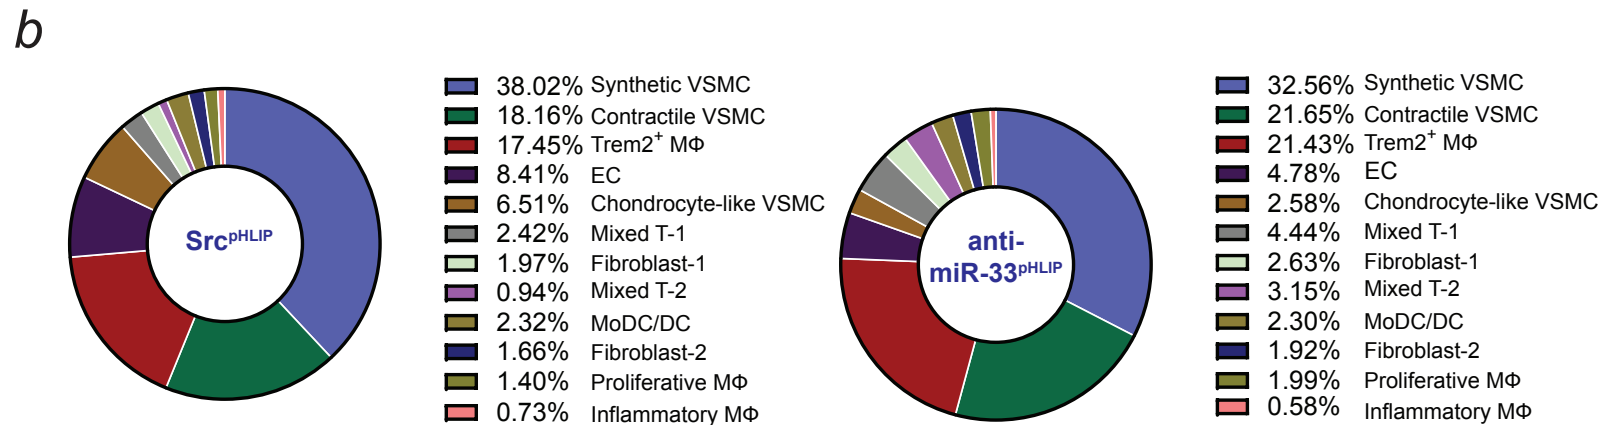

# Supplemental Figure 7

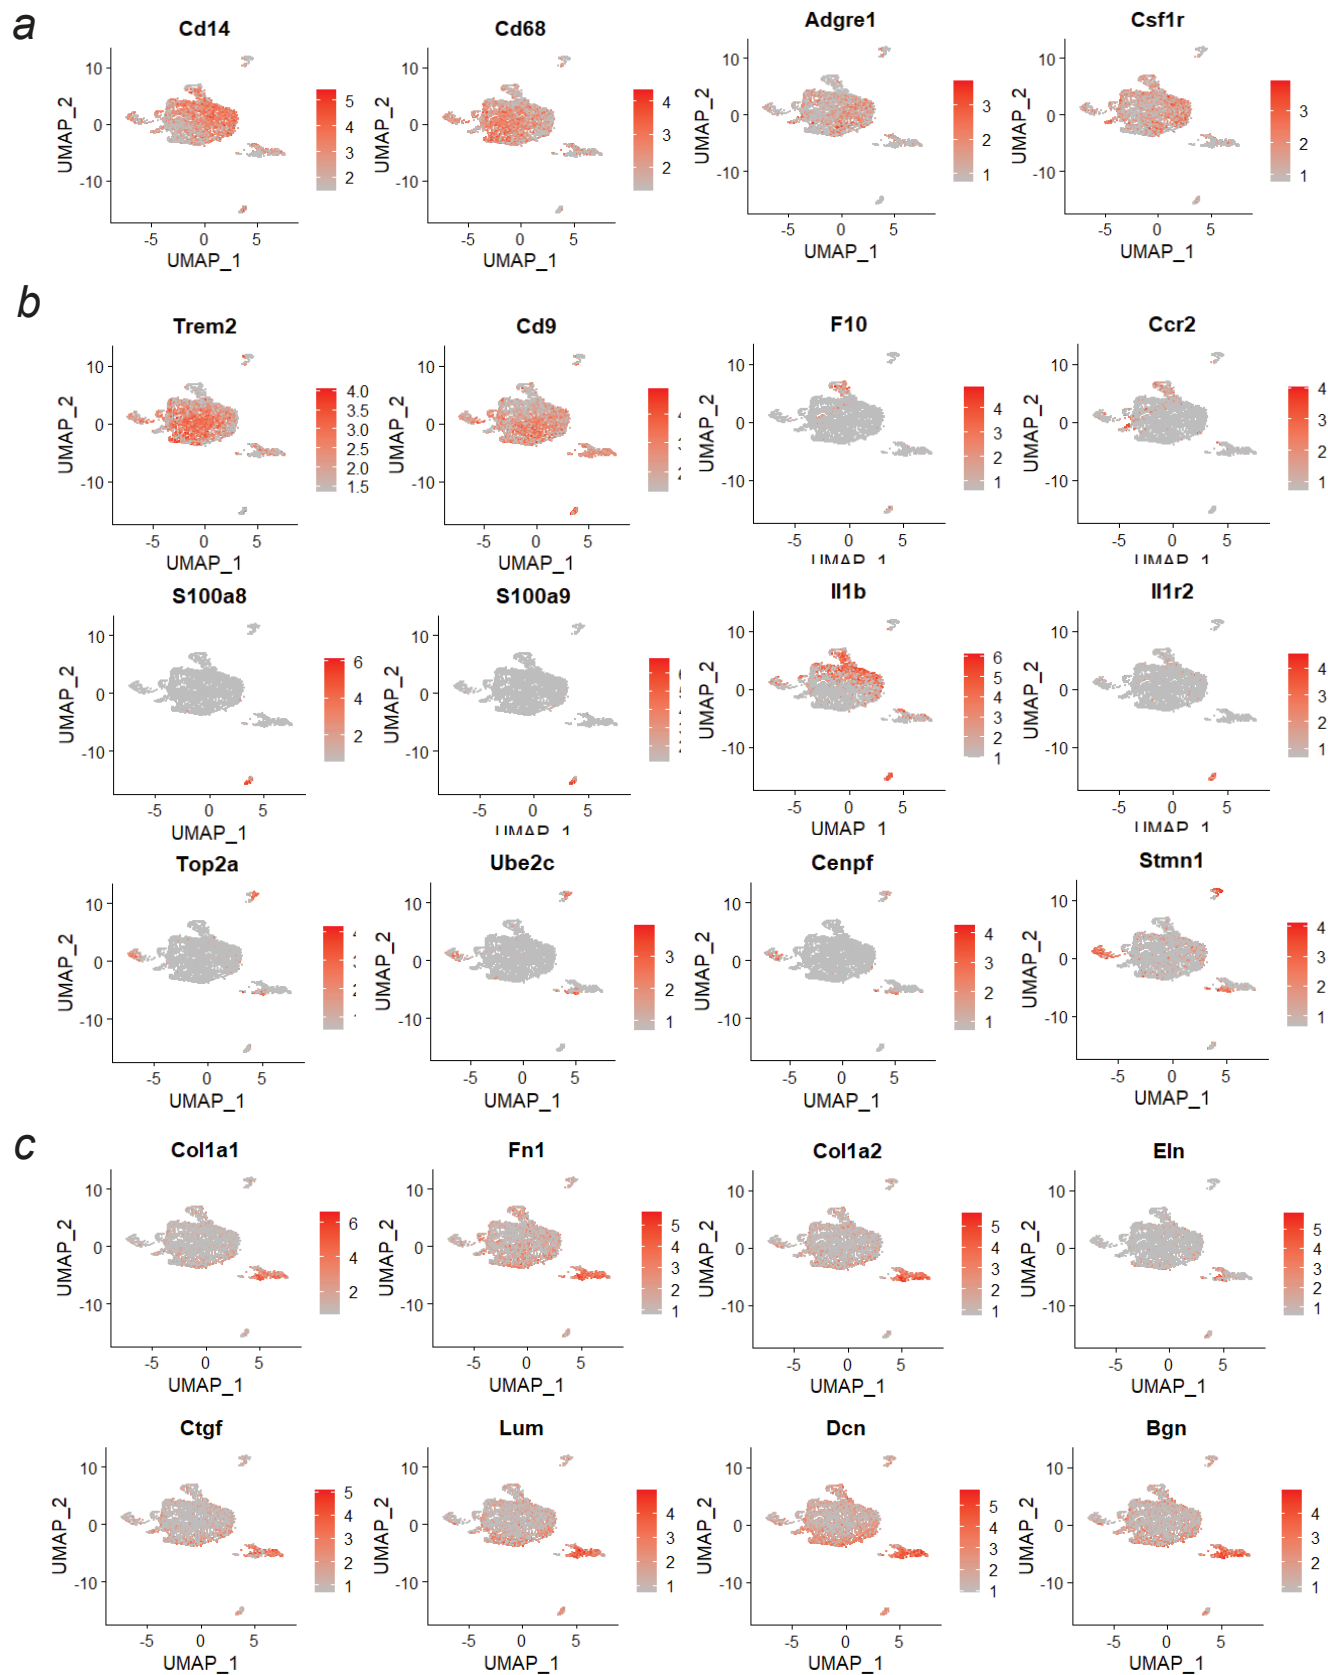

Supplement: Supplementary file 1 [file 3f4c71a9a94d8e6fe7925dbd.pdf]
